# Supplementary material for: LCST and UCST-type thermoresponsive behavior in dendronized gelatins
Source: Royal Society of Chemistry journal article supplement (doi:10.1039/d2py00118g), 2022-01-01
Supplement: d2py00118g1.pdf [file d2py00118g1.pdf]

## Supplementary Information

# LCST- and UCST-type thermoresponsive behavior in dendronized gelatins

Yan Ding,<sup>a,b</sup> Xiacong Zhang,<sup>a</sup> Biyi Xu,<sup>a</sup> and Wen Li<sup>\*a</sup>

<sup>a</sup> International Joint Laboratory of Biomimetic & Smart Polymers, School of Materials Science and Engineering, Shanghai University, 333 Nanchen Road, 200444, China.

<sup>b</sup> Institute of Chemistry and Materials Science, Huaibei Normal University, Dongshan Road 100, Huaibei 235000, China.

\*E-mail: [wli@shu.edu.cn](mailto:wli@shu.edu.cn)

## Table of Contents

|                                                                                                                                                                                                                                                                                    |   |
|------------------------------------------------------------------------------------------------------------------------------------------------------------------------------------------------------------------------------------------------------------------------------------|---|
| <b>Scheme S1.</b> Synthesis of <b>GelG1</b> .....                                                                                                                                                                                                                                  | 2 |
| <b>Fig. S1</b> <sup>1</sup> H NMR spectrum of <b>G1NP</b> in CDCl <sub>3</sub> .....                                                                                                                                                                                               | 2 |
| <b>Fig. S2</b> <sup>13</sup> C NMR spectrum of <b>G1NP</b> in CDCl <sub>3</sub> .....                                                                                                                                                                                              | 3 |
| <b>Fig. S3</b> Assembled <sup>1</sup> H NMR spectra of <b>GelG1<sub>87</sub></b> , <b>GelG1<sub>87</sub></b> and Gelatin in D <sub>2</sub> O .....                                                                                                                                 | 3 |
| <b>Fig. S4</b> <sup>13</sup> C NMR spectrum of <b>GelG1<sub>54</sub></b> in DMSO- <i>d</i> <sub>6</sub> .....                                                                                                                                                                      | 4 |
| <b>Fig. S5</b> Temperature-dependent <sup>1</sup> H NMR spectra of <b>GelG1<sub>54</sub></b> (1.0 wt %) in D <sub>2</sub> O .....                                                                                                                                                  | 4 |
| <b>Fig. S6</b> Temperature-dependent <sup>1</sup> H NMR spectra of <b>GelG1<sub>87</sub></b> (1.0 wt %) in D <sub>2</sub> O .....                                                                                                                                                  | 5 |
| <b>Fig. S7</b> The CP <sub>LCST</sub> of <b>GelG1<sub>54</sub></b> (0.5 wt %) in water with different amount of NaCl .....                                                                                                                                                         | 5 |
| <b>Fig. S8</b> The size distribution of <b>GelG1<sub>54</sub></b> (a) and <b>GelG1<sub>87</sub></b> (b) in deionized water, and <b>GelG1<sub>54</sub></b> (c) and <b>GelG1<sub>87</sub></b> (d) in deionized water containing 150 mM NaCl by dynamic light scattering .....        | 6 |
| <b>Fig. S9</b> UV-Vis and CD spectra of gelatin and dendronized gelatin in aqueous solution (0.1 mg mL <sup>-1</sup> ) at various temperatures: (a) gelatin, heating, (b) gelatin, cooling, (c) <b>GelG1<sub>54</sub></b> , cooling, (d) <b>GelG1<sub>87</sub></b> , cooling ..... | 6 |

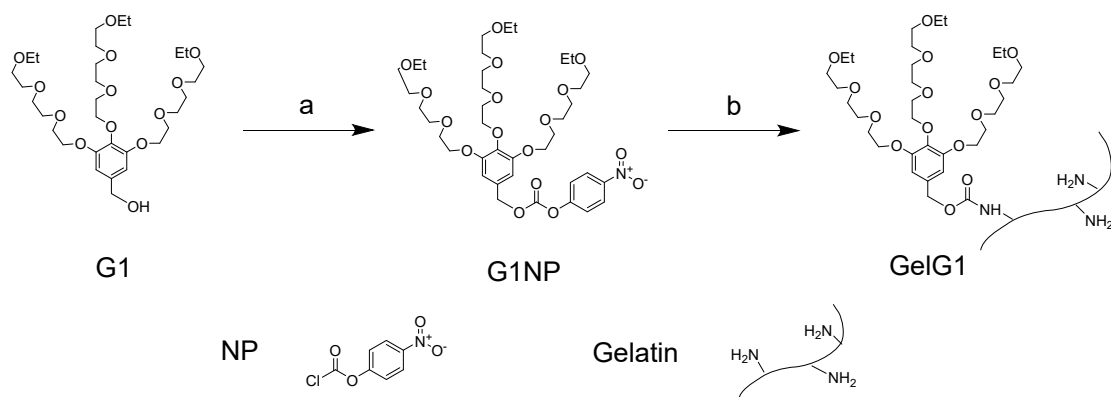

**Scheme S1.** Synthesis of **GelG1**. (a) NP, TEA, DMAP, DCM (dry), 0 to 25 °C, 12 h; (b) Gelatin, DIPEA, Acetone, 0 °C, 24 h.

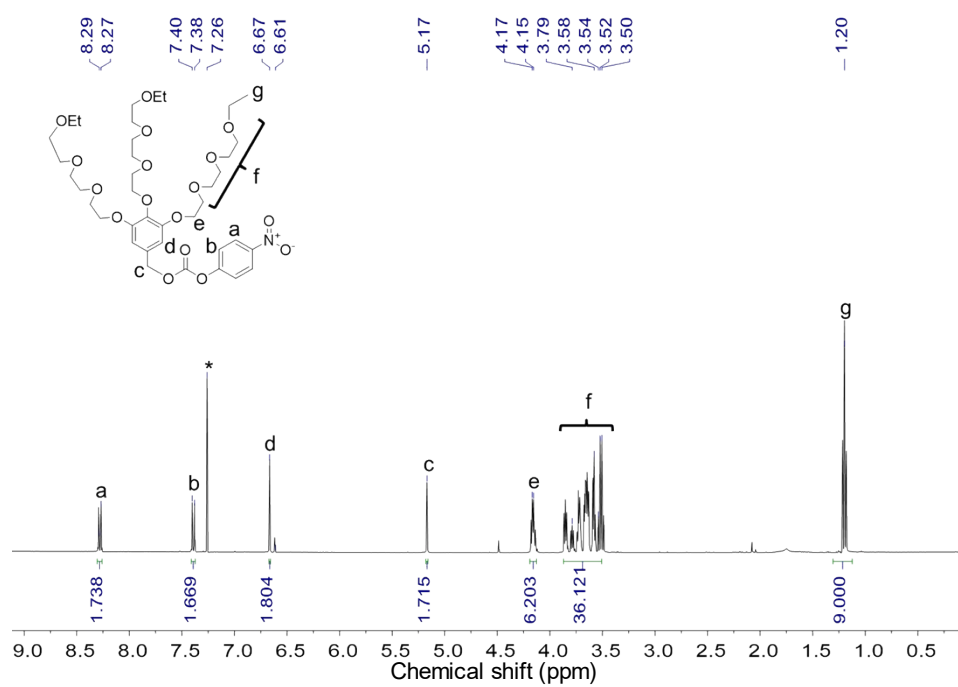

**Fig. S1**  $^1\text{H}$  NMR spectrum of **G1NP** in  $\text{CDCl}_3$ . The solvent peak is marked with asterisk (\*).

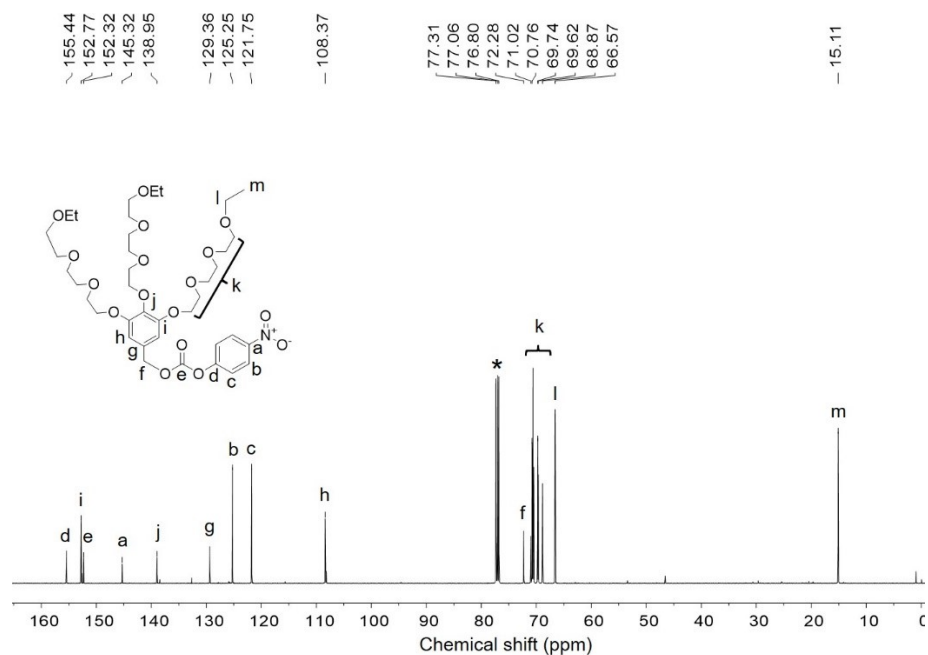

**Fig. S2**  $^{13}\text{C}$  NMR spectrum of G1NP in  $\text{CDCl}_3$ . The solvent peak is marked with asterisk (\*).

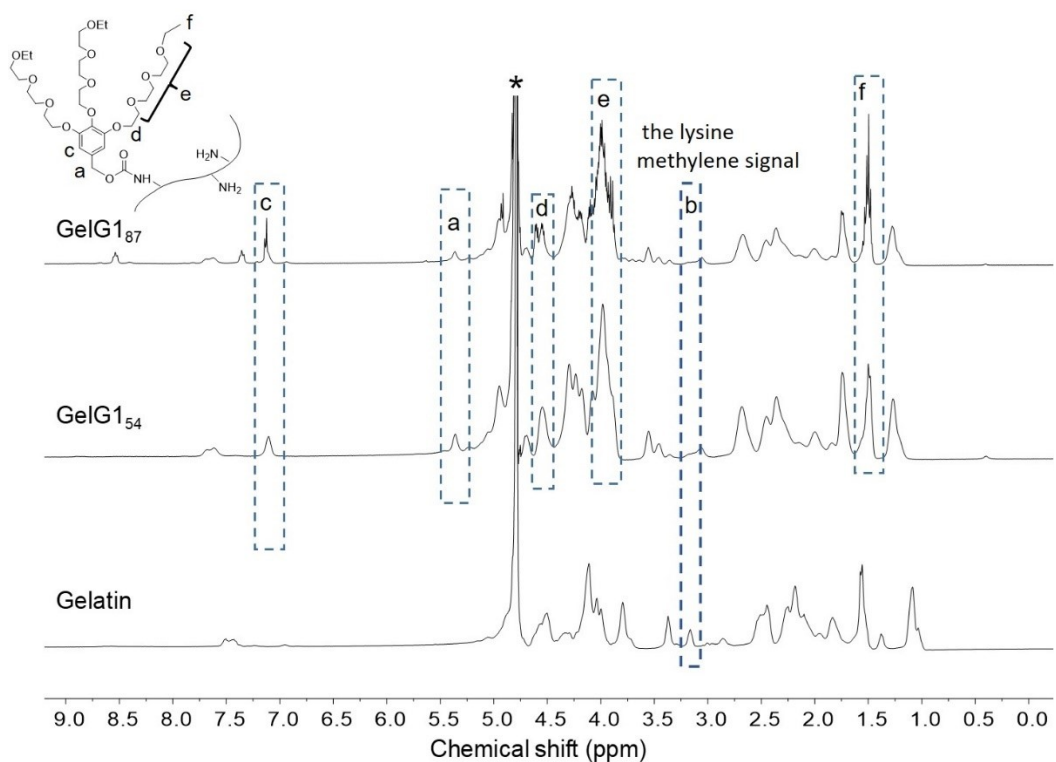

**Fig. S3** Assembled  $^1\text{H}$  NMR spectra of GelG1<sub>54</sub>, GelG1<sub>87</sub> and Gelatin in  $\text{D}_2\text{O}$ .

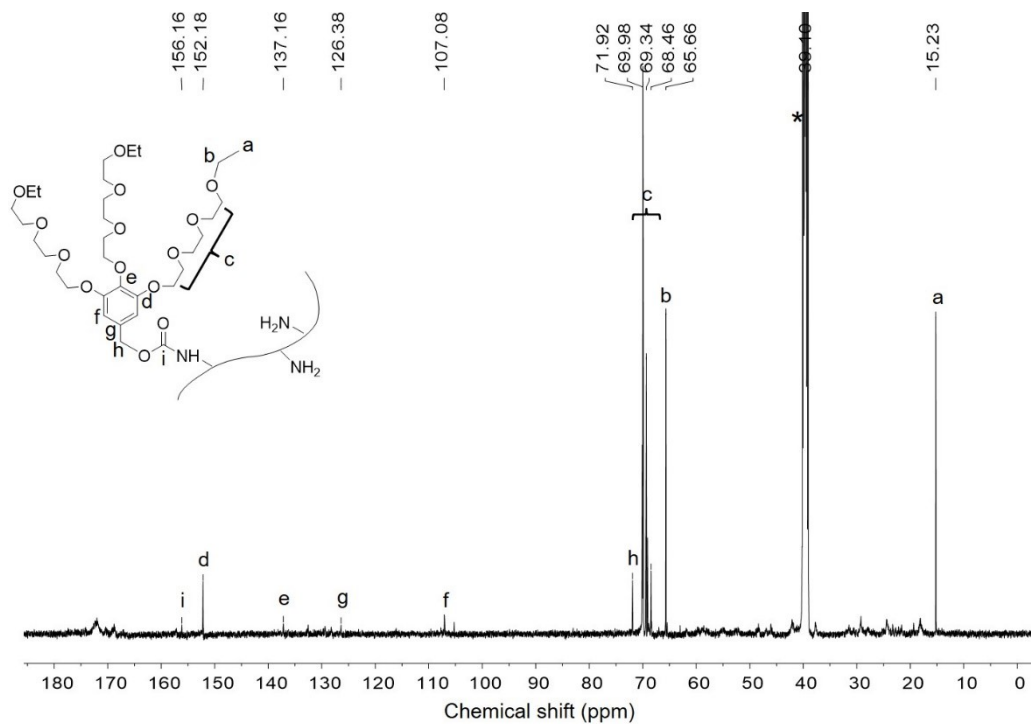

Fig. S4 <sup>13</sup>C NMR spectrum of GelG1<sub>54</sub> in DMSO-*d*<sub>6</sub>. The solvent peak is marked with asterisk (\*).

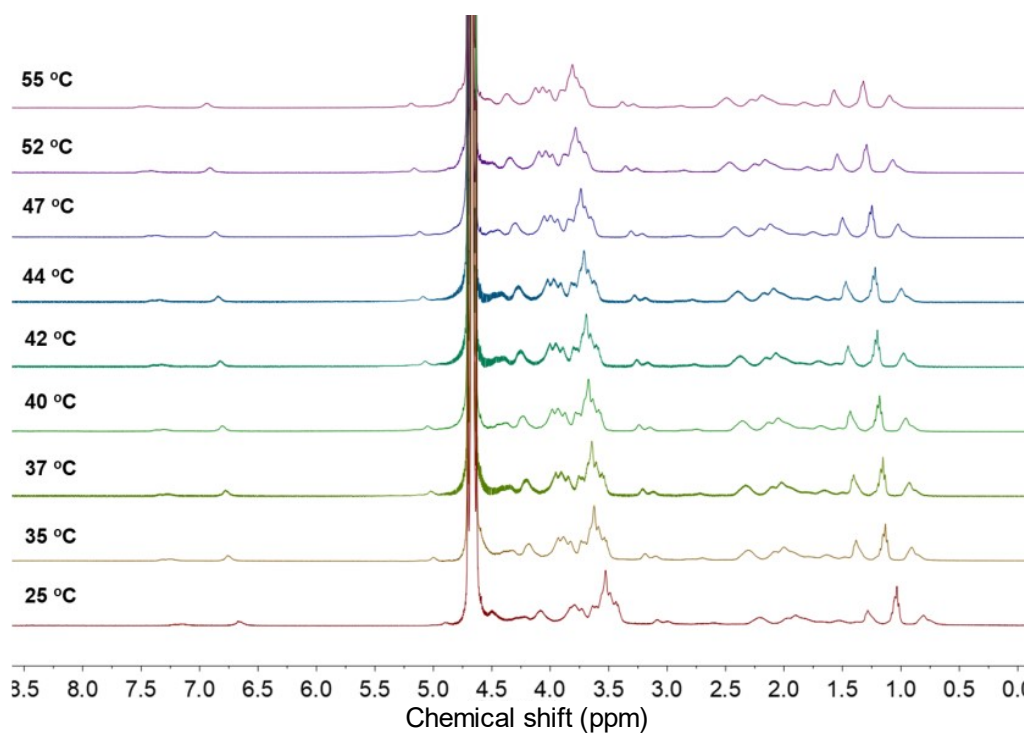

Fig. S5 Temperature-dependent <sup>1</sup>H NMR spectra of GelG1<sub>54</sub> (1.0 wt %) in D<sub>2</sub>O.

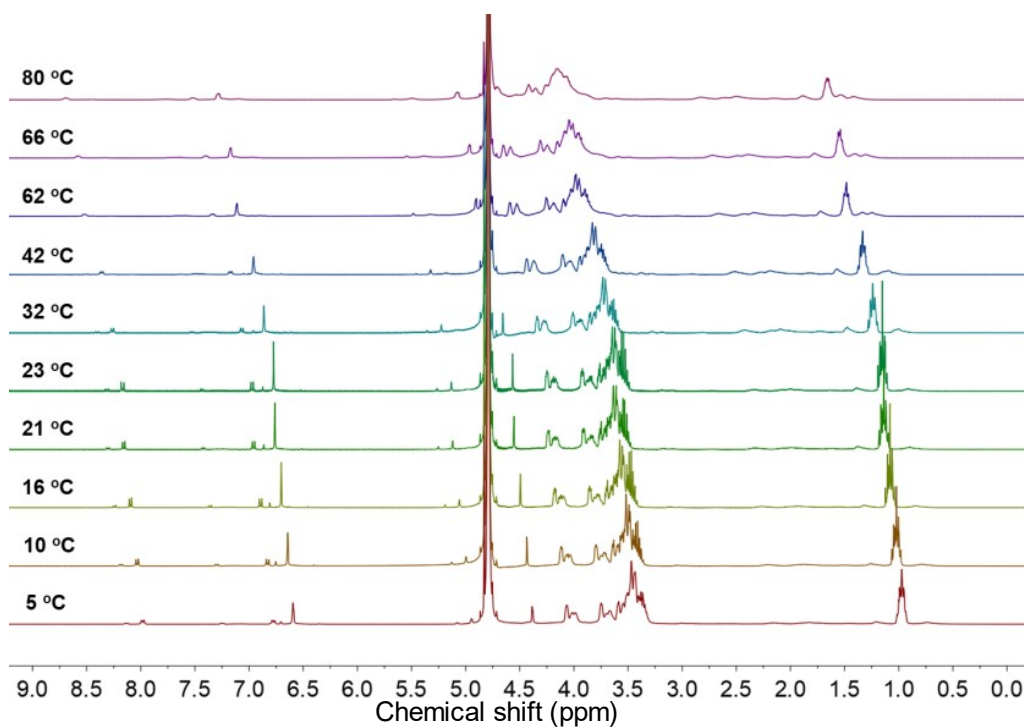

**Fig. S6** Temperature-dependent  $^1\text{H}$  NMR spectra of **GelG1<sub>87</sub>** (1.0 wt %) in  $\text{D}_2\text{O}$ .

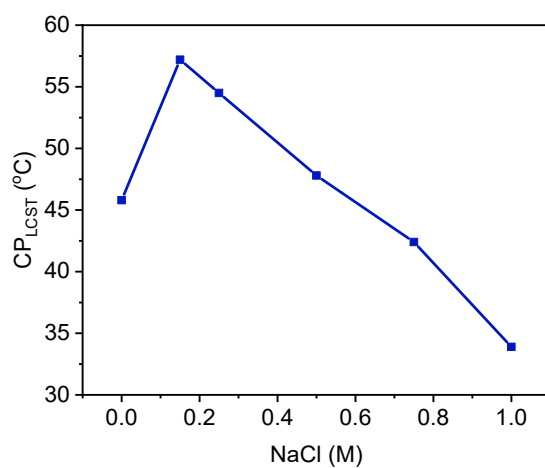

**Fig. S7** The CP<sub>LCST</sub> of **GelG1<sub>54</sub>** (0.5 wt %) in water with different amount of NaCl.

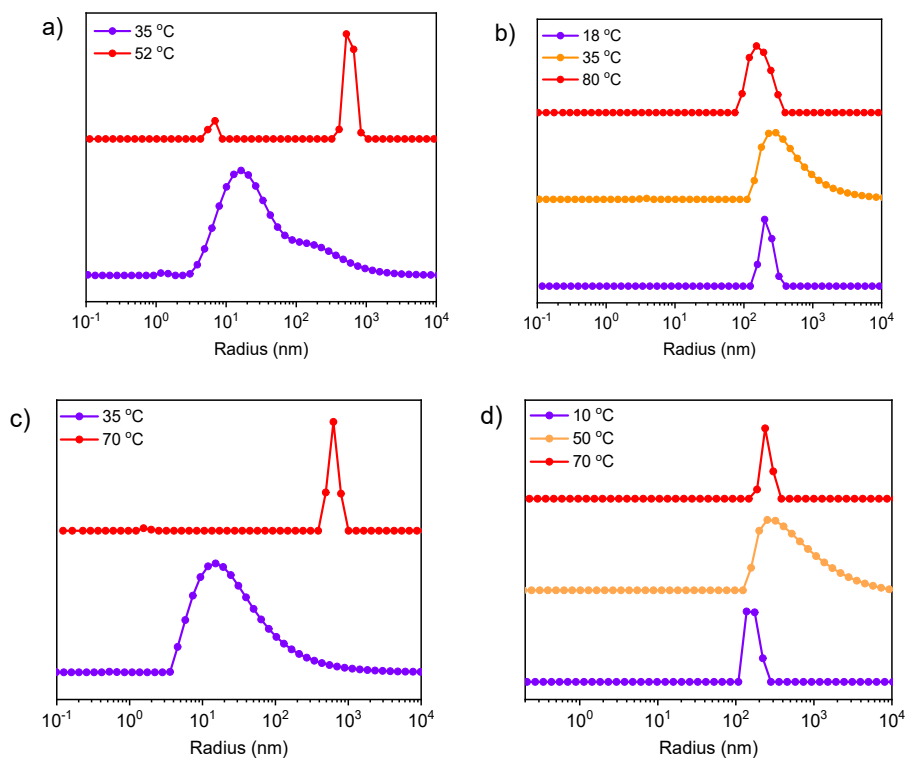

**Fig. S8** The size distribution of **GelG1<sub>54</sub>** (a) and **GelG1<sub>87</sub>** (b) in deionized water, and **GelG1<sub>54</sub>** (c) and **GelG1<sub>87</sub>** (d) in deionized water containing 150 mM NaCl by dynamic light scattering. ( $C = 0.3$  wt%).

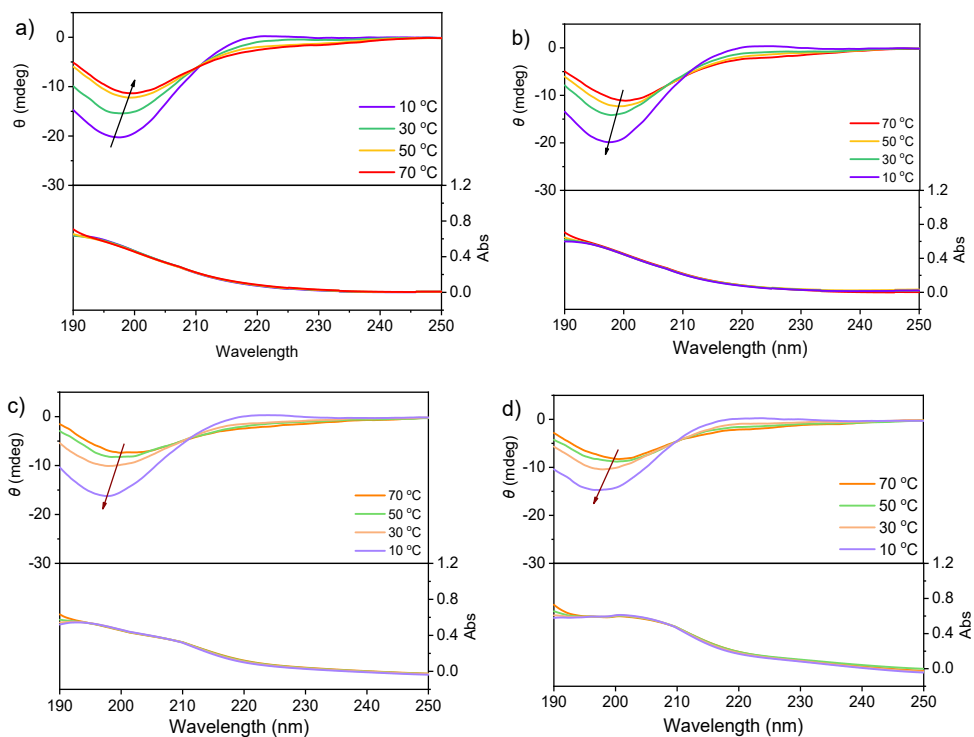

**Fig. S9** UV-Vis and CD spectra of gelatin and dendronized gelatin in aqueous solution ( $0.1 \text{ mg} \cdot \text{mL}^{-1}$ ) at various temperatures: (a) gelatin, heating, (b) gelatin, cooling, (c) **GelG1<sub>54</sub>**, cooling, (d) **GelG1<sub>87</sub>**, cooling.
